# Supplementary material for: Amino-functionalized breath-figure cavities in polystyrene–alumina hybrid films: effect of particle concentration and dispersion
Source: Royal Society of Chemistry journal article supplement (doi:10.1039/c6cp00012f), 2016-01-01
Supplement: c6cp00012f1.pdf [file c6cp00012f1.pdf]

## ESI

### **Amino-functionalized Breath-Figure cavities in Polystyrene-Alumina hybrid Films : Effect of particle concentration and dispersion**

Lakshmi V., Annu Raju, Resmi V.G., Jerin K. Pancreciuous, T. P. D. Rajan, Chorappan Pavithran,  
Materials Science and Technology Division, CSIR-National Institute for Interdisciplinary Science  
and Technology (CSIR-NIIST), Council of Scientific and Industrial Research ( CSIR) ,  
Thiruvananthapuram 695019, India.

#### **SEM and XRD of alumina particles**

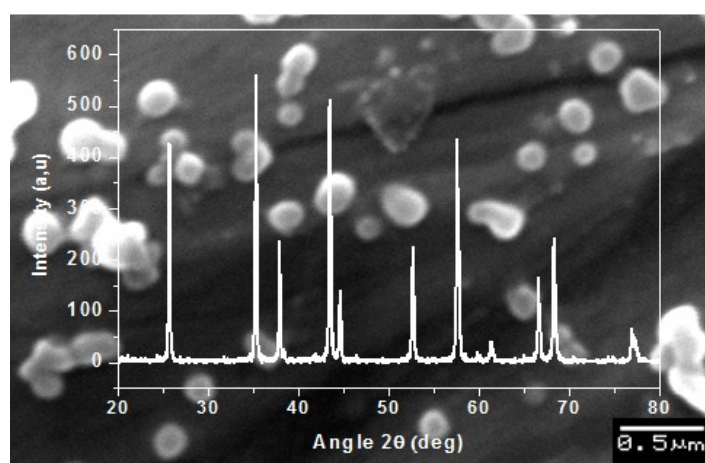

Figure S1

#### **FT-IR Spectroscopy**

FT-IR spectra were taken from Perkin Elmer Series FT-IR Spectrometer 2.

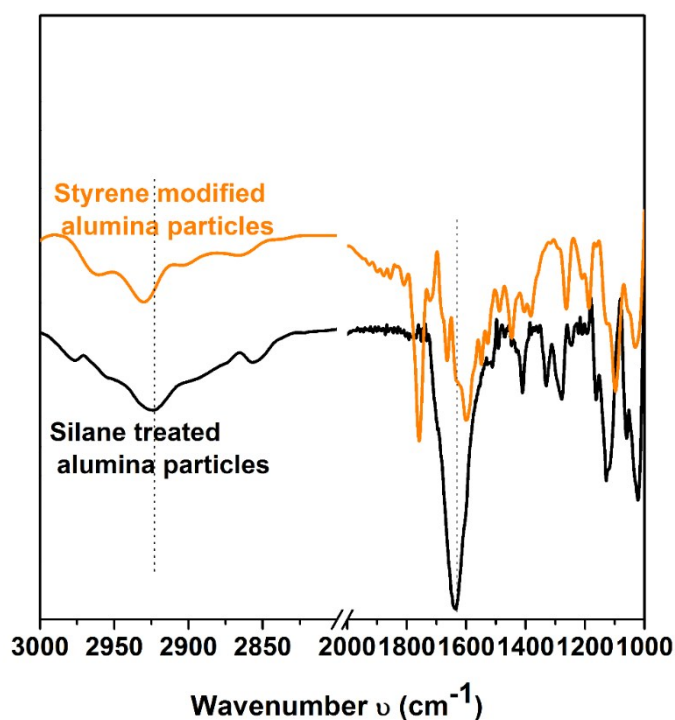

**Figure S2** FT-IR spectra of silane modified particles and styrene polymerised particles. Silane modified particles showed absorption bands at 2925, 2855 and 1524 $\text{cm}^{-1}$  due to the aminopropyl group and at 1641  $\text{cm}^{-1}$  due to the vinyl group. The presence of Si-O-Si stretching band at 1130  $\text{cm}^{-1}$  suggested the presence of oligomeric siloxanes linkage which were formed by inter-condensation of hydrolysed silane molecules. Peak intensity of  $\text{-C=CH}$  decreased in polymerized particles due to the involvement of vinyl group in polymerization. The red shift of peaks corresponds to propyl group is attributed to the chain strain experienced due to the polymer chain and the intensity of the corresponding peak increased in polymerized particle because of the large amount of  $\text{-CH}_2\text{-}$  chain.

### Thermogravimetry

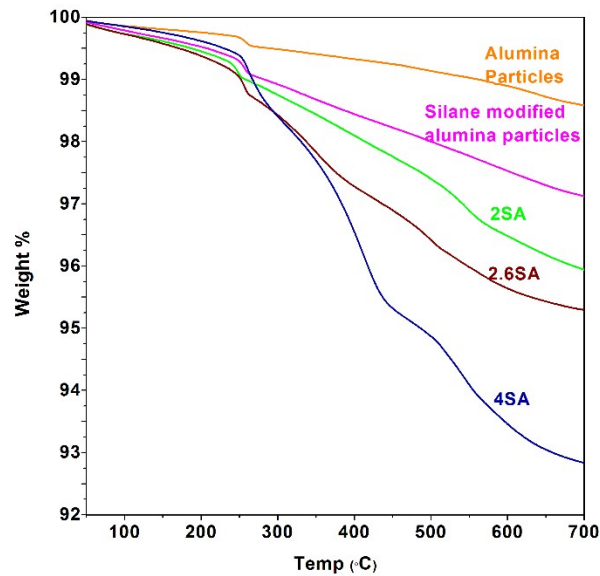

Figure S3: TGA analysis of alumina particles (A), silane treated alumina, styrene modified alumina particles (2SA, 2.6SA, 4SA)

Loss in Bare alumina = 1.11%  
 Loss in silane modified alumina = 2.86%  
 Total % of silane content = 2.86-1.11= 1.75%  
 Molar ratio of AS:VS= 1:1,

AS Mol wt= 221.37g  
 VS mol wt = 190.31

221.37 : 190.3  
 =1.16 : 1

%loss of AS = 1.75\*(1.16/2.16)=0.939%  
 % loss of VS = 1.75\*(1/2.16)=0.810 %

PS content for styrene to alumina ratio 0.07 = 1.2%  
 PS content for styrene to alumina ratio 0.09 = 1.8%  
 PS content for styrene to alumina ratio 0.1 = 3.2%

Total hydrophobic content .i.e. vinyl +polystyrene

For 2S system = 0.810+1.2 =2.01% hydrophobic/hydrophilic ratio = 2: 0.94 2:1  
 For 2.6S system = 0.810+1.8 = 2.61% hydrophobic/hydrophilic ratio = 2.6: 0.94 2.6:1  
 For 4S system = 0.810+3.2=4.01% hydrophobic/hydrophilic ratio = 4:.94 4:1

## Microstructure

Optical images were taken using Leica optical Microscope

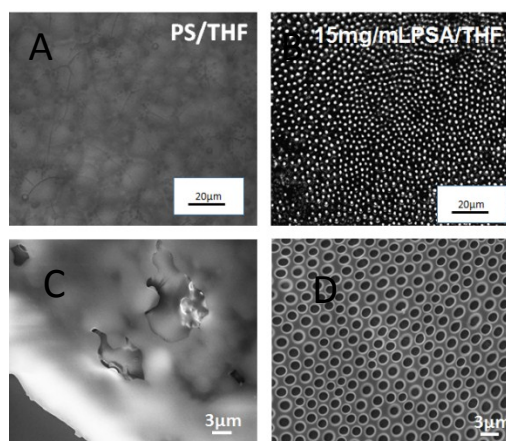

**Figure S3:** (A) Optical transmittance and (C) SEM images of drop cast film of PS/THF solution. (B) optical transmittance and (D) SEM image of drop cast film of 15mg/mL PSA/THF solution.

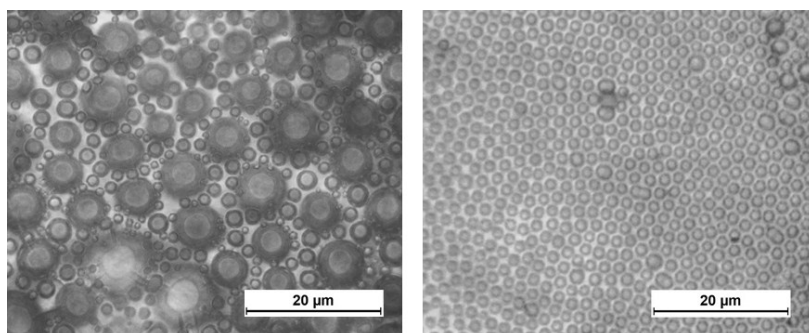

**Figure S4:** Optical Reflectance Image of drop cast film of (a) PS/CHCl<sub>3</sub> (b) PSA/CHCl<sub>3</sub> solution

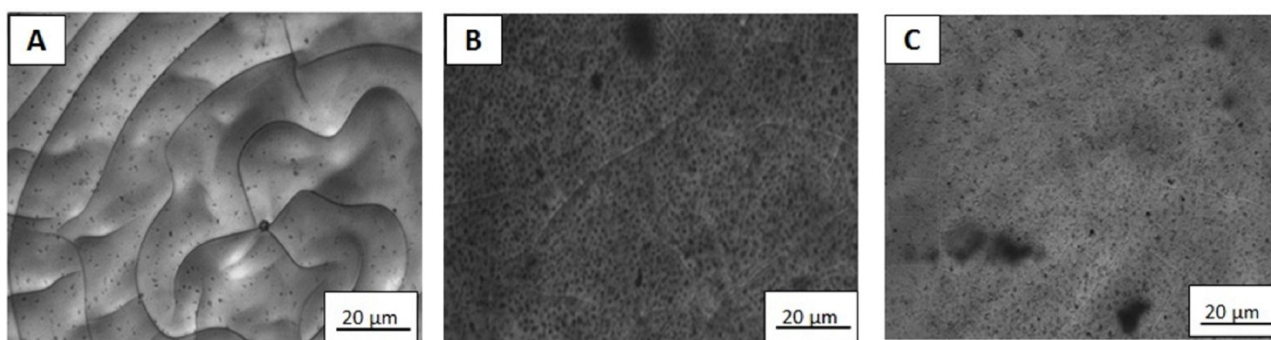

**Figure S6** Optical images of ninhydrin-treated non-patterned films of (A) P2(2SA) (B) P3(2SA) (C) P5(2SA) from THF showing distribution of alumina particles in the surface layer. The dark spots are due to reaction product of ninhydrin with amino groups of the particles.
